# Supplementary material for: Exposed Areas Above Sea Level on Earth >3.5 Gyr Ago: Implications for Prebiotic and Primitive Biotic Chemistry
Source: PubMed Central journal article supplement (PMC6316429; doi:10.3390/life8040055), 2018-11-04
Supplement: life-08-00055-s001.pdf [file life-08-00055-s001.pdf]

## Supplementary Information (SI)

Table S1

Table S1: Lake Waiiau (LW) and Rain Water Composition Relative to  $\text{Na}^+ = 1.0^*$

|         | $\text{Na}^+$ | $\text{K}^+$ | $\text{Mg}^{+2}$ | $\text{Ca}^{+2}$ | $\text{Cl}^-$ | $\text{SO}_4^{-2}$ |
|---------|---------------|--------------|------------------|------------------|---------------|--------------------|
| LW**    | 1             | 0.59         | 0.64             | 0.59             | 2.89          | 0.19               |
| Rain*** | 1             | 0.71         | 0.79             | 0.95             | 1.47          | 0.42               |

\*Lake water  $\text{Na}^+ = 6.4$  mg/l; rain water  $\text{Na}^+ = 0.19$  mg/l. Based on references S1 and S2. The lake also contains measurable levels of Cu, Fe, Ni and Zn (44).

\*\*Collected July 1972

\*\*\*Collected at Saddle Road, Hawai'i, 29.3 km from sea, ~1700 m, Oct 19-20, 1956-57

Figure S1: Miller's "volcanic" spark discharge apparatus

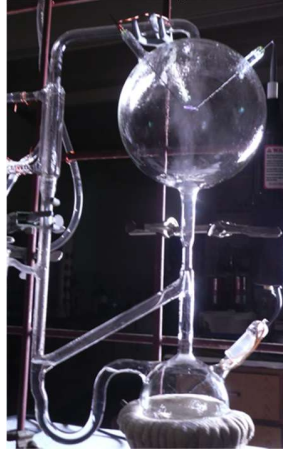

Figure S2: Laboratory based volcanic lighting (courtesy Betty Scheu and Donald Dingwell).

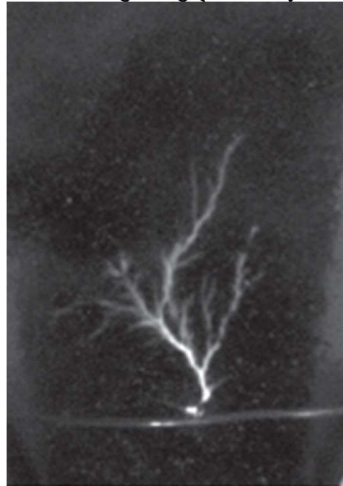

### References

S1. J. A. Maciolek, J. A. (1982). "Lakes and lake-like waters of the Hawaiian Archipelago." *Occasional Papers of Bernice P. Bishop Museum*, XXV: 1-14.

S2. Eriksson, E. (1957). "The chemical composition of Hawaiian rainfall." *Tellus*: 509-520.
